# Supplementary material for: Betaglycan (TβRIII) is a Key Factor in TGF-β2 Signaling in Prepubertal Rat Sertoli Cells
Source: PubMed Central journal article supplement (PMC6941059; doi:10.3390/ijms20246214), 2019-12-09
Supplement: ijms-20-06214-s001.pdf [file ijms-20-06214-s001.pdf]

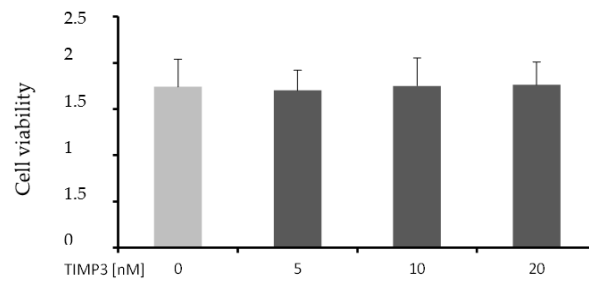

**Figure S1.** Effects of TIMP3 on cell viability. The  $7 \times 10^4$  93RS2 cells/well were incubated with different doses of TIMP3 for 48 h. Cell viability was analyzed by trypan blue and showed no effects. Each bar represents the mean  $\pm$  SEM of 3 independent experiments performed in duplicate. Dunnett's test was used for statistical analysis.
